# Supplementary material for: Expert-independent classification of mature B-cell neoplasms using standardized flow cytometry: a multicentric study
Source: PubMed Central journal article supplement — Blood Adv. 2022 Feb 3;6(3):976–92. doi: 10.1182/bloodadvances.2021005725 (PMC8945320; doi:10.1182/bloodadvances.2021005725), 2022-02-03
Supplement: advancesADV2021005725-suppl1.pdf [file advancesADV2021005725-suppl1.pdf]

# 1 Supplemental data

2

## 3 Expert-independent classification of mature B-cell neoplasms using 4 standardized flow cytometry: a multicentric study

5 Sebastian Böttcher<sup>1</sup>, Robby Engelmann<sup>1</sup>, Georgiana Grigore<sup>2</sup>, Paula Fernandez<sup>3</sup>, Joana  
6 Caetano<sup>4</sup>, Juan Flores-Montero<sup>5</sup>, Vincent H. J. van der Velden<sup>6</sup>, Michaela Novakova<sup>7</sup>, Jan  
7 Philippé<sup>8</sup>, Matthias Ritgen<sup>9</sup>, Leire Burgos<sup>10</sup>, Quentin Leclercq<sup>2,5</sup>, Sandra Lange<sup>1</sup>, Tomas  
8 Kalina<sup>7</sup>, Javier Verde Velasco<sup>2</sup>, Rafael Fluxa Rodriguez<sup>2</sup>, Jacques J.M. van Dongen<sup>11#</sup>,  
9 Carlos E. Pedreira<sup>12#</sup>, and Alberto Orfao<sup>5#</sup>, on behalf of the EuroFlow consortium

10 1 Clinic III, Special Hematology Laboratory, Rostock University Medical School, Rostock, Germany, 2 Cytognos  
11 SL, Salamanca, Spain, 3 FACS/Stem cell Laboratory, Kantonsspital Aarau AG, Aarau, Switzerland, 4 Secção de  
12 Citometria de Fluxo, Instituto Português de Oncologia de Lisboa Francisco Gentil, Lisbon, Portugal, 5 Clinical and  
13 Translational Research Program, Cancer Research Center (IBMCC-CSIC/USAL-IBSAL); Cytometry Service  
14 (NUCLEUS) and Department of Medicine, University of Salamanca, Salamanca, Spain and Centro de  
15 Investigación Biomédica en Red de Cáncer: CIBER-ONC (CB16/12/00400), Instituto de Salud Carlos III, Madrid,  
16 Spain, 6 Dept. of Immunology, Erasmus MC, University Medical Center Rotterdam, Rotterdam, Netherlands, 7  
17 CLIP - Department of Pediatric Hematology and Oncology, Charles University and University Hospital Motol,  
18 Prague, Czech Republic, 8 Department of Diagnostic Sciences, Ghent University, Ghent, Belgium, 9 Dept. of  
19 Internal Medicine II, University of Schleswig-Holstein, Campus Kiel, Kiel, Germany, 10 Clinica Universidad de  
20 Navarra, Centro de Investigación Médica Aplicada (CIMA), Instituto de Investigación Sanitaria de Navarra  
21 (IDISNA), CIBER-ONC number CB16/12/00369, Pamplona, Spain; 11 Dept. of Immunology, Leiden University  
22 Medical Center, Leiden, Netherlands, 12 Systems and Computing Department, Federal University of Rio de  
23 Janeiro, Rio de Janeiro, Brazil, # JJMvD, CEP and AO contributed equally as co-senior authors.

24

**Supplemental methods*****Patients and eligibility***

The diagnosis of a particular mature B-cell neoplasm in each individual patient was based on WHO criteria and confirmed by a predefined minimum set of ancillary methods, which always included compatible cytology and/or histology findings. There was no central pathology review of the submitted cases. MCL and BL cases were required to harbor the *CCDN1* and *MYC* translocations, respectively, while the diagnosis of DLBCL, FL, MZL, and LPL were primarily based on histology. Cytology plus basic flow cytometry were required for the CLL diagnosis. The HCL diagnosis relied on typical histology and/or cytology. Additional features, such as *BRAF V600E* mutations in HCL, *MYD88* mutations in LPL, and presence of *t(14;18)* in FL were recorded based upon availability. Deletions (*del*) 17p, *del11q*, and *del13q*, trisomy 12 (+12) and the *IGHV* mutational status were recorded in CLL when available. Information on clonal serum IgM was optionally collected, except in LPL where it was mandatory.

Samples were collected locally in all participating EuroFlow centers based upon availability of left-over sample material and completeness of required ancillary test to establish a diagnosis according to WHO. Unselected patient samples were included provided the purity of the malignant B-cell clone exceeded 90% after gating and results from the ancillary methods allowed for the diagnosis of a particular mature B-cell neoplasm.

43

***Immunophenotypic studies***

Samples were processed within 24 hours from collection. A total of 100,000 cellular events per tube from samples stained with the EuroFlow B-CLPD antibody panel (supplemental Table 2) and using EuroFlow SOP were acquired on instruments calibrated according to EuroFlow specifications<sup>1</sup>. Appropriate instrument performance and laboratory procedures were confirmed by results obtained in EuroFlow QA rounds<sup>1,2</sup>.

50

51 *Data analysis*

52 Flow cytometric analyses were performed locally by an expert using a predefined gating  
53 strategy in order to identify the aberrant B-cell clone (supplemental Figure 1). Compensated  
54 flow cytometry standard (.fcs) files were pseudonymized and uploaded on a secured server.  
55 Prior to inclusion into this study, cases were checked by a second expert (for correct  
56 acquisition, gating, purity of the malignant clone, fluorescence compensation and required  
57 annotations) following a standardized, previously published workflow.<sup>3</sup> A total of 161  
58 additional cases, that were submitted by the local EuroFlow laboratories, could not be  
59 accepted for the study. Lacking annotations to allow an unequivocal diagnosis according to  
60 WHO represented the most frequent reason for ineligibility (supplemental Table 8).

61 The malignant clone of each case was electronically separated from the other cellular events  
62 via CD45, CD19, CD20, forward (FSC), and side scatter (SSC) (supplemental Figure 1). As a  
63 rule all malignant B-cells within a sample were represented by a total of 6,000 randomly  
64 selected clonal events in further analyses. In a minority of cases, fewer total clonal B-cells  
65 were available (supplemental Table 1).

66 Prior to further analysis the nearest neighbor algorithm<sup>4</sup> as implemented into Infinicyt  
67 software (Cytognos SL, Salamanca, Spain) was applied to CD20, CD45, CD19; FSC, and  
68 SSC, so that a value for CD20, CD45, CD19, immunoglobulin(Ig) $\lambda$ , Igk, CD5, CD38, CD23,  
69 CD10, CD79b, CD200, CD43, CD31, CD305, CD11c, IgM, CD81, CD103, CD95, CD22,  
70 CD185, CD49d, CD62L, CD39, HLA-DR, and CD27 was assigned to each B-CLPD cell in a  
71 sample. Scatter parameters from the aberrant B-cell clone were normalized against the  
72 median scatter values of CD4<sup>+</sup> T-cells from the same sample using the following formula: BT  
73 ratio= $FCS_{B-cells} \times SSC_{B-cells} / FCS_{CD4+T} \times SSC_{CD4+T}$ . Thus, 26 quantitative fluorescence and  
74 scatter parameters were utilized for further lymphoma classification.

75 CD3 background expression levels were used as indicator for the level of unspecific  
76 background signal in a disease category assuming that this antigen is not expressed in B-cell

77 neoplasms (supplemental results). The expression level of each parameter was accordingly  
78 classified as informative vs. predominantly background signal in a given disease category  
79 (supplemental Table 9).

#### 80 *Selection of training cases*

81 Sixteen (in case of BL) to 20 (all other categories) cases per entity were randomly included  
82 into the training set (total n=176). We used a robust variant of Mahalanobis distance for all 26  
83 flow cytometric parameters<sup>5</sup> to determine the degree to which a single case represented that  
84 class. We confirmed that training set cases were proportionately sampled from typical and  
85 atypical cases for a disease category (supplemental Figure 6 and data not shown). The  
86 remaining 486 cases formed the independent validation cohort.

#### 87 *T-cell subpopulations as QA*

88 T-cell subpopulations identified in tube 1 were evaluated as potential within-sample QA.  
89 Specifically, median fluorescence intensities (medFIs) of the CD8<sup>+</sup>CD3<sup>+</sup> T-cell subpopulation  
90 for CD8-FITC and of the CD4<sup>+</sup>CD3<sup>+</sup> T-cell subpopulation for CD4-PacB, CD45-PacO, CD5-  
91 PerCP-Cy5.5, and CD3-APC were extracted for all cases with at least 200 events of the  
92 respective subpopulations.

#### 93 *Statistical methods*

94 Infinicyt software (developmental version 2.0.3 a.B-CLPD\_S3) was used to analyze the flow  
95 cytometry data, to apply the nearest neighbor algorithm<sup>4</sup>, to select the training cases, to build  
96 the database, to plot CCA-based two-dimensional projections and to classify the test cases  
97 according to the algorithm. We performed 1,000 bootstraps of the validation set (1,000x  
98 random selection with replacement from each entity until the numbers of the original  
99 validation set for each entity were reached) as initially described by Efron et al.<sup>6</sup> and applied  
100 e.g. by Hoster et al.<sup>7</sup> This approach allowed us to approximate mean and distribution of  
101 specificity, sensitivity, positive (PPV) and negative predictive values (NPV) per disease  
102 category when the fixed training set was used (Table 4). The stability of the model was

103 investigated using Monte Carlo cross-validation<sup>8,9</sup>. We randomly selected the same number  
104 of training cases per entity as in the initial model (16 BL training cases, 20 training cases for  
105 other B-CLPD entities), created 36 CCA-based projections per iteration, adapted the SD lines  
106 to create non-overlapping decision criteria for automated diagnosis and performed the  
107 classification of the remaining cases as validation set. Based on 1,000 iterations (i.e. 1,000x  
108 random split of training and validation cohorts) mean and distribution for sensitivity,  
109 specificity, PPV, and NPV per disease category were calculated. R (v. 4.0.2) was used for  
110 data analysis and box-plot figures. Significance of single parameter differences between  
111 entities was assessed by the Kruskal-Wallis test followed by the Dunns post-hoc test with the  
112 Holms correction in  $\log_{10}$  transformed data. Intra- and inter-center coefficients of variation  
113 (CV) were compared using t-test with Bonferroni correction.  $P < 0.05$  was considered  
114 statistically significant.

115

116

117 **Supplemental results**118 *Using antigens on T-cell subpopulations for in-sample QA*

119

120 The expression levels of T-cell antigens on residual T-cells were used to quantify technical  
121 variation of the method and to establish an in-sample QA. Of note, we report herein very  
122 similar mean medFIs for T-cell antigens assessed on bystander T-cells in B-cell lymphoma  
123 cases compared to previously reported medFI from EuroFlow QA rounds with normal  
124 donors<sup>2</sup>, thus validating the robustness of our technical standardization. The quality of  
125 individual measurements can therefore be estimated in the future by comparing medFI of  
126 bystander T-cell subpopulations in a newly acquired sample to the reference values provided  
127 in Table 2. Considering the maximum inter-center CV (32.8%) we recommend that  
128 measurements with medFI for the T-cell antigen on T-cell subpopulations outside a range  
129 between 34.4% and 165.6% of the mean medFI reference values (equals +/- 2-fold CV) to be  
130 considered technical outliers.

131

132 *General principles on the utility of markers using univariate analysis for B-CLPD classification*

133 (1) Each of the 26 parameters shows significant differences between the peripheral B-  
134 cell lymphoma entities. The distribution of medFI per entity suggests that for some  
135 markers (e.g. CD103 in DLBCL, Figure 3A) significant differences might be caused by  
136 autofluorescent and/or unspecific binding of antibodies to larger lymphoma cells.

137 (2) Expression levels provide more important diagnostic information compared to a  
138 purely qualitative analysis (i.e. positive vs negative). In general, autofluorescence can  
139 be seen up to roughly 200 fluorescence channels using EuroFlow standardization  
140 (data not shown), i.e. 'positivity' of individual cases can be usually defined as medFI  
141 above 200 channels. For example, almost all cases analyzed showed at least partial  
142 CD20 expression (for exceptional CD20<sup>-</sup> cases see Figure 3A), however, median

143 CD20 expression levels in CLL are roughly 6 fold lower than in MCL. Moreover,  
144 median CD20 expression was almost 4fold greater in HCL than in MCL.

145 (3) Differences between entities in expression levels clearly exceeded technical variation  
146 observed for T-cells, e.g. an almost 18fold difference between FL and MCL for  
147 median CD305 (Figure 3 B). These differences therefore reflect biological differences  
148 between entities that cannot be attributed to technical variation (CV in T-cells  $\leq$   
149 32.2%).

150 (4) Expression levels commonly overlap between entities. For example, in spite of under-  
151 expression of CD20 in CLL, there are rare DLBCL and MCL cases with similarly low  
152 expression (Figure 3 A). Markers with expression ranges virtually specific for a  
153 particular entity were observed in HCL only (Figure 3A: CD103, CD11c, Figure 3B:  
154 CD305). Reliable flow cytometric diagnostic approaches therefore as a rule require  
155 the combined information from different markers.

156 (5) Expression levels of markers are frequently heterogeneous within disease entities,  
157 e.g. some FL cases lack CD10 almost completely, whereas that marker shows some  
158 expression in a subgroup of HCL cases. A reliable diagnostic strategy has to account  
159 for such heterogeneity and has to focus on markers with a low intra-disease variance.

160

#### 161 *Significance of CD200 and CD305 example antigens*

162 We confirm published observations<sup>10-14</sup> that CD200 rarely, if at all, is expressed in MCL,  
163 while CLL and HCL patients express the antigen at high density. Data on CD200 in FL  
164 ranged from negative in one study<sup>13</sup> to negative to moderate in other evaluations<sup>12, 14</sup>. Using  
165 a large set of FL patients we confirm a negative to moderate CD200 expression in this type  
166 of lymphoma. Whereas there are currently only anecdotic reports on CD200 in BL available  
167<sup>12-14</sup> we consistently found very low CD200 expression in our cohort of 29 BL cases. Finally,  
168 median CD200 expression was much higher in CD10<sup>-</sup> compared to CD10<sup>+</sup> DLBCL, again  
169 emphasizing the biological heterogeneity of DLBCL.

170 CD305 (LAIR-1) was utilized in mature B-cell lymphoid neoplasms so far as a prognostic  
171 marker in CLL<sup>15-17</sup> and in an attempt to monitor minimal residual disease (MRD) in MCL<sup>18</sup>.  
172 We herein (Figure 3B) confirm the broad expression range in CLL. CD305 indeed shows a  
173 bimodal pattern (data not shown) suggestive of its utility as prognostic classification marker  
174 within this leukemia. However, due to heterogeneous, dim to moderate expression its general  
175 applicability as MRD marker in MCL<sup>18</sup> remains questionable. Nevertheless, we regard CD305  
176 as a very valuable diagnostic marker in mature B-cell lymphomas for its homogeneously high  
177 level expression in HCL and very low expression level in FL. The latter feature contributes to  
178 differential diagnosis between FL on the one hand vs LPL, MCL, and MZL taken as a group  
179 on the other hand.

#### 180 *Contribution of background signal to marker expression*

181 Literature describes CD103 expression as an almost specific feature for HCL. Accordingly,  
182 we observed low level CD103 expression in diseases other than HCL. However, the  
183 expression levels differed significantly by diseases entity (with e.g. median medFI in CD10<sup>+</sup>  
184 DLBCL almost 3fold higher than in FL, supplemental Table 6 and Figure 3A). We found a  
185 significant correlation between CD3 (Supplementary figure 7) and CD103 expression levels  
186 ( $r=0.43$ ,  $p<0.001$ ) for all entities except HCL.

187 In summary, low level differences in expression levels are unlikely to be caused by specific  
188 fluorescence from the fluorochrome-labelled antibody. These variations are likely due to  
189 unspecific staining and autofluorescence as a function of cell size. Fluorescence signals  
190 originating from autofluorescence or unspecific antibody binding only (background signal) in  
191 a given entity were estimated as the 90<sup>th</sup> percentile of the CD3 medFI, assuming that there is  
192 no CD3 expression in B-cell lymphomas. Parameters for which the medFI of less than 20%  
193 of training set cases exceeded that background signal were considered non-informative  
194 (supplemental Table 9).

195



196

197 **Supplemental references**

- 198 1. Kalina T, Flores-Montero J, van der Velden VH, et al. EuroFlow standardization of  
199 flow cytometer instrument settings and immunophenotyping protocols. *Leukemia*.  
200 2012;26(9):1986-2010.
- 201 2. Kalina T, Flores-Montero J, Lecomte Q, et al. Quality assessment program for  
202 EuroFlow protocols: summary results of four-year (2010-2013) quality assurance rounds.  
203 *Cytometry A*. 2015;87(2):145-56.
- 204 3. Lhermitte L, Mejstrikova E, van der Sluijs-Gelling AJ, et al. Automated database-  
205 guided expert-supervised orientation for immunophenotypic diagnosis and classification of  
206 acute leukemia. *Leukemia*. 2018;32(4):874-81.
- 207 4. Pedreira CE, Costa ES, Barrena S, et al. Generation of flow cytometry data files with  
208 a potentially infinite number of dimensions. *Cytometry A*. 2008;73(9):834-46.
- 209 5. Leys C, Klein O, Dominicy Y, Ley C. Detecting multivariate outliers: Use a robust  
210 variant of the Mahalanobis distance. *Journal of Experimental Social Psychology*.  
211 2018;74:150-6.
- 212 6. Efron BT, R. J. The bootstrap estimate of standard error. In: Efron BT, R. J., editor. An  
213 introduction to the bootstrap: Springer Science; 1994. p. 45-57.
- 214 7. Hoster E, Dreyling M, Klapper W, et al. A new prognostic index (MIPI) for patients with  
215 advanced-stage mantle cell lymphoma. *Blood*. 2008;111(2):558-65.
- 216 8. Xu Q, Liang Y. Monte Carlo cross validation. *Chemometrics and Intelligent Laboratory*  
217 *System*. 2001;56:1-11.
- 218 9. Pan L, Liu G, Lin F, et al. Machine learning applications for prediction of relapse in  
219 childhood acute lymphoblastic leukemia. *Scientific reports*. 2017;7(1):7402.
- 220 10. Palumbo GA, Parrinello N, Fargione G, et al. CD200 expression may help in  
221 differential diagnosis between mantle cell lymphoma and B-cell chronic lymphocytic  
222 leukemia. *Leuk Res*. 2009;33(9):1212-6.
- 223 11. Brunetti L, Di Noto R, Abate G, et al. CD200/OX2, a cell surface molecule with  
224 immuno-regulatory function, is consistently expressed on hairy cell leukaemia neoplastic  
225 cells. *Br J Haematol*. 2009;145(5):665-7.
- 226 12. Rahman K, Kumar P, Gupta R, Singh MK, Nityanand S. Role of CD200 in differential  
227 diagnosis of mature B-cell neoplasm. *International journal of laboratory hematology*.  
228 2017;39(4):384-91.
- 229 13. Arlindo EM, Marcondes NA, Fernandes FB, Faulhaber GAM. Quantitative flow  
230 cytometric evaluation of CD200, CD123, CD43 and CD52 as a tool for the differential  
231 diagnosis of mature B-cell neoplasms. *Revista brasileira de hematologia e hemoterapia*.  
232 2017;39(3):252-8.
- 233 14. Challagundla P, Medeiros LJ, Kanagal-Shamanna R, Miranda RN, Jorgensen JL.  
234 Differential expression of CD200 in B-cell neoplasms by flow cytometry can assist in  
235 diagnosis, subclassification, and bone marrow staging. *American journal of clinical pathology*.  
236 2014;142(6):837-44.
- 237 15. Rawstron AC, Shingles J, de Tute R, Bennett F, Jack AS, Hillmen P. Chronic  
238 lymphocytic leukaemia (CLL) and CLL-type monoclonal B-cell lymphocytosis (MBL) show  
239 differential expression of molecules involved in lymphoid tissue homing. *Cytometry B Clin*  
240 *Cytom*. 2010;78 (Suppl 1):S42-6.
- 241 16. Poggi A, Catellani S, Bruzzone A, Caligaris-Cappio F, Gobbi M, Zocchi MR. Lack of  
242 the leukocyte-associated Ig-like receptor-1 expression in high-risk chronic lymphocytic  
243 leukaemia results in the absence of a negative signal regulating kinase activation and cell  
244 division. *Leukemia*. 2008;22(5):980-8.
- 245 17. Perbellini O, Falisi E, Giaretta I, et al. Clinical significance of LAIR1 (CD305) as  
246 assessed by flow cytometry in a prospective series of patients with chronic lymphocytic  
247 leukemia. *Haematologica*. 2014;99(5):881-7.

- 248 18. Cheminant M, Derrieux C, Touzart A, et al. Minimal residual disease monitoring by 8-  
249 color flow cytometry in mantle cell lymphoma: an EU-MCL and LYSA study. *Haematologica*.  
250 2016;101(3):336-45.
- 251 19. van Dongen JJ, Lhermitte L, Bottcher S, et al. EuroFlow antibody panels for  
252 standardized n-dimensional flow cytometric immunophenotyping of normal, reactive and  
253 malignant leukocytes. *Leukemia*. 2012;26(9):1908-75.

254

255 **Supplemental Tables**256 **Supplemental Table 1. Detailed biological and demographic features of patients. (\*two**

257 CLL cases had del13q plus +12)

| Disease category       | Parameter            |                  | Database (n=176) | Validation Cohort (n=486) |
|------------------------|----------------------|------------------|------------------|---------------------------|
| BL                     | N                    |                  | 16               | 13                        |
|                        | Age (years)          | Median (min-max) | 6.5 (2-66)       | 12 (3-73)                 |
|                        | Gender (n)           | F                | 3                | 3                         |
|                        |                      | M                | 13               | 10                        |
|                        | Sample type (n)      | PB               | 0                | 1                         |
|                        |                      | BM               | 8                | 6                         |
|                        |                      | LN               | 6                | 2                         |
|                        |                      | other            | 2                | 4                         |
|                        | Genetic aberrations  | t(8;14)          | 12               | 10                        |
|                        |                      | t(8;22)          | 2                | 0                         |
| t(2;8)                 |                      | 2                | 0                |                           |
| Partner unknown        |                      | 0                | 3                |                           |
| CLL                    | n                    |                  | 20               | 125                       |
|                        | Age (years)          | Median (min-max) | 73.5 (53-93)     | 68 (35-92)                |
|                        | Gender (n)           | F                | 3                | 45                        |
|                        |                      | M                | 17               | 80                        |
|                        | Sample type (n)      | PB               | 17               | 115                       |
|                        |                      | BM               | 1                | 6                         |
|                        |                      | LN               | 2                | 4                         |
|                        |                      | other            | 0                | 0                         |
|                        | Genetic aberrations* | del13q           | 5                | 28                        |
|                        |                      | del11q           | 1                | 5                         |
|                        |                      | del17p           | 0                | 4                         |
|                        |                      | +12              | 0                | 9                         |
|                        |                      | NT               | 12               | 69                        |
| IGVH mutational status | mutated              | 1                | 19               |                           |
|                        | unmutated            | 3                | 12               |                           |
|                        | NT                   | 16               | 94               |                           |
| DLBCL                  | n                    |                  | 40               | 64                        |
|                        | Age (years)          | Median (min-max) | 65.5 (21-86)     | 68 (12-95)                |
|                        | Gender (n)           | F                | 18               | 36                        |
|                        |                      | M                | 22               | 28                        |
|                        | Sample type (n)      | PB               | 3                | 1                         |
|                        |                      | BM               | 12               | 20                        |
| LN                     |                      | 17               | 24               |                           |
| other                  |                      | 8                | 19               |                           |
| FL                     | n                    |                  | 20               | 109                       |
|                        | Age (years)          | Median (min-max) | 72.5 (30-86)     | 62 (35-87)                |
|                        | Gender (n)           | F                | 11               | 63                        |
|                        |                      | M                | 9                | 46                        |
| Sample type (n)        | PB                   | 3                | 21               |                           |
|                        | BM                   | 6                | 31               |                           |

|         |                 |                  |              |              |
|---------|-----------------|------------------|--------------|--------------|
|         | Grade           | LN               | 8            | 48           |
|         |                 | other            | 3            | 9            |
|         |                 | I                | 11           | 34           |
|         |                 | II               | 2            | 13           |
|         |                 | III              | 3            | 13           |
|         |                 | I-II             | 0            | 13           |
|         |                 | unknown          | 4            | 36           |
|         |                 | t(14;18)         | positive     | 14           |
|         | negative        | 1                | 11           |              |
|         | NT              | 5                | 35           |              |
| HCL     | n               |                  | 20           | 38           |
|         | Age (years)     | Median (min-max) | 67.5 (35-85) | 60 (36-79)   |
|         | Gender (n)      | F                | 6            | 10           |
|         |                 | M                | 14           | 28           |
|         | Sample type (n) | PB               | 13           | 18           |
|         |                 | BM               | 7            | 20           |
|         |                 | LN               | 0            | 0            |
|         |                 | other            | 0            | 0            |
|         | BRAF V600E      | mutated          | 1            | 14           |
|         |                 | unmutated        | 0            | 3            |
| unknown |                 | 19               | 21           |              |
| LPL     | n               |                  | 20           | 54           |
|         | Age (years)     | Median (min-max) | 76 (41-88)   | 66.5 (38-87) |
|         | Gender (n)      | F                | 7            | 14           |
|         |                 | M                | 13           | 40           |
|         | Sample type (n) | PB               | 3            | 5            |
|         |                 | BM               | 17           | 49           |
|         |                 | LN               | 0            | 0            |
|         |                 | other            | 0            | 0            |
| MyD88   | mutated         | 5                | 22           |              |
|         | unmutated       | 3                | 2            |              |
|         | unknown         | 12               | 30           |              |
| MCL     | n               |                  | 20           | 56           |
|         | Age (years)     | Median (min-max) | 70 (50-82)   | 66.5 (34-85) |
|         | Gender (n)      | F                | 5            | 13           |
|         |                 | M                | 15           | 43           |
|         | Sample type (n) | PB               | 11           | 31           |
|         |                 | BM               | 5            | 19           |
|         |                 | LN               | 3            | 5            |
| other   |                 | 1                | 1            |              |
| MZL     | n               |                  | 20           | 27           |
|         | Age (years)     | Median (min-max) | 69 (46-83)   | 68 (38-88)   |
|         | Gender (n)      | F                | 12           | 14           |
|         |                 | M                | 8            | 13           |
|         | Sample type (n) | PB               | 5            | 9            |
|         |                 | BM               | 9            | 12           |
|         |                 | LN               | 5            | 4            |
| other   |                 | 1                | 2            |              |

259 Abbreviations: BL, Burkitt lymphoma; BM, bone marrow; CLL, chronic lymphocytic leukemia;  
260 DLBCL, diffuse large B-cell lymphoma; F, female; FL, follicular lymphoma; HCL, hairy cell  
261 leukemia; LN, lymph node; LPL, lymphoplasmacytic lymphoma; M, male; MCL, mantle cell  
262 lymphoma; MZL, marginal zone lymphoma; NT, not tested; PB, peripheral blood.

263

264 **Supplemental Table 2: Composition of the EuroFlow B-CLPD panel** <sup>19</sup> In 71 samples the  
 265 Cytognos Lyo LST kit was used. In 17 samples the following alternative reagents were used:  
 266 CD45 OC, CD81 APC C750. Please note that tube 1 of the B-CLPD panel equals the  
 267 Lymphoid Screening Tube. For regularly updated information on clones and titres refer to  
 268 [www.euroflow.org](http://www.euroflow.org)

| Tube      | Pac Blue      | Pac Orange | FITC        | PE           | PerCP-Cy5.5 | PECy7           | APC   | APC-H7 |
|-----------|---------------|------------|-------------|--------------|-------------|-----------------|-------|--------|
| 1=<br>LST | CD20 /<br>CD4 | CD45       | IgA/<br>CD8 | Igκ/<br>CD56 | CD5         | CD19 /<br>TCRγδ | CD3   | CD38   |
| 2         | CD20          | CD45       | CD23        | CD10         | CD79b       | CD19            | CD200 | CD43   |
| 3         | CD20          | CD45       | CD31        | CD305        | CD11c       | CD19            | IgM   | CD81   |
| 4         | CD20          | CD45       | CD103       | CD95         | CD22        | CD19            | CD185 | CD49d  |
| 5         | CD20          | CD45       | CD62L       | CD39         | HLA-DR      | CD19            | CD27  |        |

269

| Marker  | Fluorochrome | Clone      | Source            | Catalogue number | (µl/test) |
|---------|--------------|------------|-------------------|------------------|-----------|
| CD3     | APC          | SK7        | BD Biosciences    | 345767           | 2.5       |
| CD4     | PacB         | RPA-T4     | BioLegend         | 300521           | 0.5       |
| CD5     | PerCP-Cy5.5  | L17F12     | BD Biosciences    | 341109           | 15        |
| CD8     | FITC         | UCH-T4     | Cytognos          | Cyt-8F8          | 1         |
| CD10    | PE           | ALB1       | Beckmann Coulter  | A07760           | 20        |
| CD11c   | PerCP-Cy5.5  | B-ly6      | BD Biosciences    | 658330           | 10        |
| CD19    | PECy7        | J3-119     | Beckmann Coulter  | IM3628           | 5         |
| CD20    | PacB         | 2H7        | BioLegend         | 302320           | 1         |
| CD22    | PerCP-Cy5.5  | S-HCL-1    | BD Biosciences    | 658329           | 25        |
| CD23    | FITC         | MHM6       | Dako              | F7062            | 2.5       |
| CD27    | APC          | L128       | BD Biosciences    | 337169           | 2.5       |
| CD31    | FITC         | WM59       | BD Pharmingen     | 555445           | 10        |
| CD38    | APC H7       | HB7        | BD Biosciences    | 656646           | 3         |
| CD39    | PE           | TU66       | BD Pharmingen     | 555464           | 10        |
| CD43    | APC H7       | 1G10       | BD Biosciences    | 655407           | 2.5       |
| CD45    | PacO         | HI30       | life technologies | MHCD4530         | 5         |
| CD49d   | APC H7       | 9F10       | BD Biosciences    | 658332           | 1         |
| CD56    | PE           | C5.9       | Cytognos          | Cyt-56PE         | 2         |
| CD62L   | FITC         | SK11       | BD Biosciences    | 347443           | 2.5       |
| CD79b   | PerCP-Cy5.5  | SN8        | BD Biosciences    | 656644           | 10        |
| CD81    | APC H7       | JS-81      | BD Biosciences    | 656647           | 5         |
| CD95    | PE           | DX2        | BD Pharmingen     | 555674           | 20        |
| CD103   | FITC         | Ber-ACT8   | BD Biosciences    | 333155           | 2         |
| CD185   | APC          | 51505      | R&D Systems       | FAB190A          | 10        |
| CD200   | APC          | OX104      | life technologies | 17-9200          | 1.25      |
| CD305   | PE           | DX26       | BD Pharmingen     | 550811           | 10        |
| HLA-DR  | PerCP-Cy5.5  | L243       | BD Biosciences    | 339216           | 10        |
| IgM     | APC          | G20-127    | BD Pharmingen     | 551062           | 10        |
| IgA/Igκ | FITC/PE      | polyclonal | Cytognos          | CYT-LF-KPE-100   | 2.5       |
| TCRγδ-1 | PE-Cy7       | 11F2       | BD Biosciences    | 655410           | 3         |

270

271 Abbreviations: APC, Allophycocyanin; CV, coefficient of variation; FITC, Fluorescein  
272 Isothiocyanate; MedFI, median fluorescence intensity; PacB, Pacific Blue; PacO, Pacific  
273 Orange; PE, Phycoerythrin; PerCP, Peridinin-Chlorophyll-Protein

274

275

276

277 **Supplemental Table 3. Overview on the data analysis strategy within the scope of the**  
 278 **main study.** Data was analyzed using Infinicyt software unless stated otherwise. For the  
 279 validation of the modular design, steps 8 to 10 were repeated using the parameters from  
 280 tubes 1 and 2 only. \*Background signal cannot be identified for the BT parameter. The  
 281 software algorithms of the Infinicyt software correspond to the following mathematical  
 282 algorithms: calculate data: nearest neighbor algorithm, Robust Curve: Robust Mahalanobis  
 283 distance.

| Aim | Specification                                                                                                                                                                                                  | Category individually analyzed, No.            | Details / results       |
|-----|----------------------------------------------------------------------------------------------------------------------------------------------------------------------------------------------------------------|------------------------------------------------|-------------------------|
| 1   | <ul style="list-style-type: none"> <li>exclusion of T-cells in tube 1</li> <li>merge of tubes 1 to 5</li> <li>gating on back-bone markers: CD19, CD20, CD45, FSC, SSC</li> </ul>                               | Patient samples, n=662                         | Suppl. Fig.1            |
| 2   | <ul style="list-style-type: none"> <li>gating of CD8<sup>+</sup>CD3<sup>+</sup> and CD4<sup>+</sup>CD3<sup>+</sup> T-cell subpopulations in tube 1</li> </ul>                                                  | Patient samples, n=662                         |                         |
| 3   | <ul style="list-style-type: none"> <li>Calculate Data function using CD19, CD20, CD45, FSC, SSC as common parameters to each malignant B-cell</li> </ul>                                                       | Patient samples, n=662                         |                         |
| 4   | <ul style="list-style-type: none"> <li>virtual parameter Igκ+Igλ to reflect light chain expression level</li> <li>Normalization of FSC and SSC vs. CD4<sup>+</sup>CD3<sup>+</sup> cells</li> </ul>             | Patient samples, n=662                         |                         |
| 5   | <ul style="list-style-type: none"> <li>Export of medFI per sample</li> <li>Statistical analysis and graphs (R software)</li> </ul>                                                                             | Patient samples, n=662<br>9 B-CLPD entities    | Fig.3                   |
| 6   | <ul style="list-style-type: none"> <li>Ordering cases according to 1D Robust Curve within an entity</li> <li>Checking training cases to represent the distribution of 1D Robust Curve of the entity</li> </ul> | 9 B-CLPD entities                              |                         |
| 7   | <ul style="list-style-type: none"> <li>Comparison of medFI to apparent CD3 expression of entity (R software) in training set cases</li> </ul>                                                                  | 9 B-CLPD entities and 25 fluorescent markers,* | Suppl. Table 9          |
| 8   | <ul style="list-style-type: none"> <li>CCA projections of training set cases after removal of background signal parameters per differential diagnosis</li> </ul>                                               | 36 B-CLPD pair-wise differential diagnosis     | Fig. 2, Suppl. Fig. 2   |
| 9   | <ul style="list-style-type: none"> <li>Creation of non-overlapping SD lines of training set cases</li> </ul>                                                                                                   | 36 B-CLPD pair-wise differential diagnosis     | Suppl. Table 5. Fig. 2. |
| 10  | <ul style="list-style-type: none"> <li>Inclusion into all diagnostic criteria of a single entity required</li> </ul>                                                                                           | Validation set of B-CLPD cases (n=486)         | Table 4, Fig. 4         |

284



285 Abbreviations: CCA, Canonical Correlation Analysis; FSC, forward scatter; medFI, median  
286 fluorescence intensity; SD, standard deviation; SSC, sideward scatter; QA, quality  
287 assessment.

288

289

290 **Supplemental Table 4. Canonical coefficients for CA1 and CA2. Significance of**  
291 **contribution of individual parameters to the canonical axes CA1 and CA2 by**  
292 **differential diagnosis.** Values derived from the training cases. Please refer to separate  
293 EXCEL supplemental file. T1-T5 refers to the analyses from the full data set, T1-T2 provides  
294 information after restriction to tubes 1 and 2.

295 Abbreviations: BL, Burkitt lymphoma; BT ratio, scatter ratio between malignant B-cell clone  
296 and residual T-cells; CLL, chronic lymphocytic leukemia; DLBCL, diffuse large B-cell  
297 lymphoma; FL, follicular lymphoma; HCL, hairy cell leukemia; CA, canonical axis; LPL,  
298 lymphoplasmacytic lymphoma; MCL, mantle cell lymphoma; MZL, marginal zone lymphoma

299

300

301 **Supplemental Table 5. SD lines utilized as decision criterion per pair-wise differential**302 **diagnosis.** Numbers in brackets represent non-overlapping SD lines when only the

303 information from tubes 1 and 2 was used. Greater SD lines correspond to better separation

|                | BL           | CD10-<br>DLBCL | CD10+<br>DLBCL | CLL          | FL           | HCL          | LPL          | MCL          |
|----------------|--------------|----------------|----------------|--------------|--------------|--------------|--------------|--------------|
| CD10-<br>DLBCL | 2.0<br>(2.0) |                |                |              |              |              |              |              |
| CD10+<br>DLBCL | 1.0<br>(1.0) | 1.5<br>(1.0)   |                |              |              |              |              |              |
| CLL            | 3.0<br>(3.0) | 2.0<br>(1.5)   | 2.5<br>(2.5)   |              |              |              |              |              |
| FL             | 1.5<br>(1.5) | 1.0<br>(1.0)   | 0.5<br>(0.5)   | 2.5<br>(2.0) |              |              |              |              |
| HCL            | 3.0<br>(2.5) | 2.0<br>(0.5)   | 2.0<br>(1.5)   | 3.0<br>(2.5) | 2.5<br>(1.5) |              |              |              |
| LPL            | 2.0<br>(2.0) | 1.0<br>(1.0)   | 2.0<br>(1.5)   | 2.5<br>(2.0) | 1.5<br>(1.0) | 2.5<br>(1.5) |              |              |
| MCL            | 2.5<br>(2.5) | 2.0<br>(1.0)   | 2.0<br>(1.5)   | 2.0<br>(2.0) | 2.0<br>(1.5) | 2.5<br>(2.0) | 1.5<br>(1.0) |              |
| MZL            | 2.0<br>(1.5) | 0.5<br>(0.5)   | 1.5<br>(1.0)   | 2.0<br>(1.5) | 1.0<br>(1.0) | 2.0<br>(0.5) | 1.0<br>(0.5) | 2.0<br>(1.0) |

304

305 Abbreviations: BL, Burkitt lymphoma; CLL, chronic lymphocytic leukemia; DLBC, diffuse

306 large B-cell lymphoma; FL, follicular lymphoma; HCL, hairy cell leukemia; LPL,

307 lymphoplasmacytic lymphoma; MCL, mantle cell lymphoma; MZL, marginal zone lymphoma.

308

309 **Supplemental Table 6. Medians (10<sup>th</sup> – 90<sup>th</sup> percentile) of medFIs and of BT ratio,**  
 310 **respectively, by parameter and entity (see Figure 3 for corresponding box plots).**

| Parameter    | BL                           | CD10 <sup>-</sup><br>DLBCL | CD10 <sup>+</sup><br>DLBCL | CLL                          | FL                            | HCL                          | LPL                        | MCL                        | MZL                        |
|--------------|------------------------------|----------------------------|----------------------------|------------------------------|-------------------------------|------------------------------|----------------------------|----------------------------|----------------------------|
| <i>CD10</i>  | 2347***<br>(1379 - 5674)     | 67***<br>(27 - 140)        | 1848***<br>(513 - 5149)    | <b>26</b><br>(10 - 57)       | 1390***<br>(361 - 4436)       | 91***<br>(35 - 3889)         | 40<br>(20 - 78)            | 35<br>(18 - 88)            | 48*<br>(16 - 79)           |
| <i>CD103</i> | 76<br>(49 - 132)             | 125***<br>(45 - 249)       | 148***<br>(61 - 308)       | 61<br>(44 - 84)              | <b>55</b><br>(23 - 131)       | 1728***<br>(792 - 3707)      | 77*<br>(46 - 117)          | 71<br>(47 - 117)           | 89**<br>(57 - 188)         |
| <i>CD11c</i> | 86<br>(44 - 194)             | 163***<br>(69 - 1262)      | 119**<br>(58 - 580)        | 190***<br>(63 - 496)         | <b>68</b><br>(37 - 227)       | 10547***<br>(3760 - 21628)   | 113<br>(46 - 206)          | 69<br>(28 - 165)           | 183*<br>(72 - 776)         |
| <i>CD185</i> | 6689***<br>(2417 - 14898)    | 5710***<br>(846 - 18060)   | 5349***<br>(1156 - 20635)  | 13244***<br>(2962 - 23431)   | 3650***<br>(868 - 10776)      | <b>782</b><br>(209 - 3691)   | 2010<br>(517 - 9215)       | 9258***<br>(1658 - 23500)  | 4126**<br>(907 - 14833)    |
| <i>CD19</i>  | 9666***<br>(4801 - 19572)    | 9023***<br>(3281 - 26399)  | 4885<br>(2214 - 13832)     | 9017***<br>(5326 - 14139)    | <b>4747</b><br>(1839 - 10535) | 29035***<br>(15656 - 54521)  | 9055***<br>(4204 - 16529)  | 6747<br>(3008 - 12169)     | 13784***<br>(5679 - 22462) |
| <i>CD20</i>  | 16260***<br>(10329 - 30281)  | 15346***<br>(2800 - 48402) | 19693***<br>(5256 - 53113) | <b>3229</b><br>(1607 - 8081) | 16590***<br>(8307 - 32409)    | 75760***<br>(43013 - 124973) | 17096***<br>(5721 - 29211) | 19458***<br>(7736 - 36902) | 24327***<br>(8062 - 48735) |
| <i>CD200</i> | 109<br>(51 - 275)            | 783***<br>(86 - 3613)      | 136**<br>(49 - 1535)       | 4396***<br>(2395 - 7743)     | 215***<br>(73 - 1247)         | 7306***<br>(661 - 19275)     | 1125***<br>(185 - 3435)    | <b>42</b><br>(-6 - 165)    | 559***<br>(88 - 3065)      |
| <i>CD22</i>  | 1276<br>(560 - 3536)         | 2655***<br>(270 - 13924)   | 3096***<br>(621 - 7377)    | <b>850</b><br>(376 - 1951)   | 2093***<br>(465 - 6625)       | 24089***<br>(6811 - 38209)   | 1181<br>(459 - 3212)       | 1438<br>(372 - 4508)       | 3815***<br>(934 - 9959)    |
| <i>CD23</i>  | <b>92</b><br>(52 - 148)      | 215**<br>(85 - 668)        | 174*<br>(70 - 523)         | 1230***<br>(384 - 3183)      | 160*<br>(50 - 1005)           | 210**<br>(117 - 409)         | 123<br>(78 - 275)          | 107<br>(68 - 244)          | 160<br>(97 - 425)          |
| <i>CD27</i>  | 747**<br>(150 - 3942)        | 329<br>(44 - 2038)         | 791***<br>(15 - 5690)      | 1910***<br>(858 - 3962)      | 258<br>(23 - 2235)            | <b>108</b><br>(1 - 764)      | 443<br>(51 - 1358)         | 1105***<br>(206 - 2846)    | 758**<br>(93 - 4191)       |
| <i>CD305</i> | 75*<br>(38 - 258)            | 103***<br>(46 - 338)       | 74**<br>(32 - 464)         | 172***<br>(15 - 1426)        | <b>32</b><br>(17 - 85)        | 9577***<br>(4454 - 17809)    | 73***<br>(28 - 752)        | 568***<br>(42 - 1437)      | 75**<br>(30 - 1576)        |
| <i>CD31</i>  | 172<br>(91 - 410)            | 259*<br>(140 - 541)        | 215<br>(89 - 587)          | 730***<br>(399 - 1273)       | <b>120</b><br>(56 - 304)      | 1641***<br>(615 - 2924)      | 552***<br>(256 - 1282)     | 513***<br>(231 - 908)      | 307**<br>(105 - 959)       |
| <i>CD38</i>  | 10451***<br>(5817 - 15501)   | 755***<br>(48 - 6689)      | 3253***<br>(375 - 7854)    | <b>114</b><br>(-45 - 561)    | 504***<br>(162 - 2249)        | 425**<br>(-117 - 1534)       | 276**<br>(-23 - 2149)      | 1044***<br>(88 - 3110)     | 287<br>(36 - 958)          |
| <i>CD39</i>  | <b>70</b><br>(32 - 133)      | 851***<br>(131 - 4635)     | 137**<br>(65 - 7410)       | 857***<br>(327 - 1951)       | 120<br>(37 - 540)             | 1024***<br>(287 - 3917)      | 408***<br>(138 - 1052)     | 944***<br>(275 - 2181)     | 662***<br>(125 - 2073)     |
| <i>CD43</i>  | 1670***<br>(781 - 3818)      | 490***<br>(104 - 2750)     | 275<br>(101 - 1287)        | 3638***<br>(1207 - 6288)     | <b>131</b><br>(34 - 453)      | 850***<br>(139 - 2392)       | 295<br>(37 - 932)          | 626***<br>(170 - 2015)     | 363<br>(74 - 937)          |
| <i>CD45</i>  | <b>2501</b><br>(1352 - 3867) | 4193**<br>(1769 - 6679)    | 4028*<br>(1592 - 5714)     | 2796<br>(1948 - 4272)        | 3593*<br>(1688 - 5591)        | 6681***<br>(4591 - 10191)    | 4534***<br>(3326 - 6319)   | 3397<br>(2121 - 4588)      | 4239**<br>(2697 - 6501)    |
| <i>CD49d</i> | 540**<br>(325 -              | 537*<br>(104 -             | 359<br>(116 -              | <b>256</b><br>(89 - 735)     | 424*<br>(96 -                 | 1354***<br>(570 -            | 856***<br>(413 -           | 574***<br>(223 -           | 804***<br>(257 -           |

|                  |                            |                           |                           |                              |                              |                            |                           |                           |                          |
|------------------|----------------------------|---------------------------|---------------------------|------------------------------|------------------------------|----------------------------|---------------------------|---------------------------|--------------------------|
|                  | 1223)                      | 1501)                     | 1274)                     |                              | 1074)                        | 2788)                      | 1849)                     | 1125)                     | 1504)                    |
| <i>CD5</i>       | 89<br>(-1 - 255)           | 220*<br>(70 - 692)        | 153<br>(51 - 528)         | 3685***<br>(976 - 7045)      | <b>80</b><br>(3 - 364)       | 240<br>(117 - 589)         | 177<br>(40 - 692)         | 2285***<br>(923 - 5835)   | 159<br>(64 - 552)        |
| <i>CD62L</i>     | <b>96</b><br>(53 - 158)    | 216**<br>(100 - 549)      | 226**<br>(73 - 625)       | 534***<br>(132 - 2185)       | 111<br>(40 - 475)            | 289***<br>(139 - 916)      | 291***<br>(123 - 1742)    | 117<br>(66 - 305)         | 156*<br>(99 - 1004)      |
| <i>CD79b</i>     | 3696***<br>(203 - 15497)   | 773**<br>(116 - 5833)     | 3100***<br>(199 - 15032)  | <b>271</b><br>(94 - 667)     | 3095***<br>(325 - 12047)     | 2405***<br>(446 - 11397)   | 6239***<br>(1286 - 20394) | 4577***<br>(907 - 16636)  | 1217***<br>(227 - 9340)  |
| <i>CD81</i>      | 13133***<br>(5128 - 20995) | 3075***<br>(868 - 8988)   | 5457***<br>(1385 - 17621) | <b>579</b><br>(326 - 1082)   | 2946***<br>(978 - 6291)      | 1108**<br>(209 - 3572)     | 1638***<br>(766 - 3945)   | 1693***<br>(840 - 3348)   | 2018***<br>(771 - 4689)  |
| <i>CD95</i>      | 201<br>(112 - 478)         | 885***<br>(131 - 8888)    | 1845***<br>(192 - 9065)   | 122<br>(62 - 268)            | 526***<br>(145 - 2122)       | 656***<br>(258 - 1427)     | 293***<br>(104 - 852)     | <b>118</b><br>(75 - 230)  | 412***<br>(111 - 3094)   |
| <i>HLA-DR</i>    | 12286<br>(4475 - 71589)    | 13059<br>(971 - 84012)    | 17425*<br>(1270 - 84266)  | 12948<br>(3133 - 32925)      | <b>5512</b><br>(816 - 76359) | 9560<br>(2881 - 37063)     | 6462<br>(2205 - 20169)    | 10124<br>(3742 - 27124)   | 9638<br>(4723 - 35978)   |
| <i>IgM</i>       | 2071**<br>(78 - 13812)     | 666**<br>(78 - 4639)      | 238**<br>(40 - 8034)      | <b>131</b><br>(48 - 490)     | 336**<br>(30 - 9372)         | 344*<br>(80 - 2675)        | 3117***<br>(333 - 11164)  | 3512***<br>(539 - 14785)  | 664***<br>(72 - 6744)    |
| <i>Igκ + Igλ</i> | 12118***<br>(2445 - 28428) | 6279***<br>(1037 - 16087) | 9094***<br>(1606 - 30317) | <b>1805</b><br>(557 - 4614)  | 6960***<br>(785 - 29414)     | 10617***<br>(1797 - 31089) | 9920***<br>(1989 - 52827) | 8078***<br>(1037 - 38262) | 5248***<br>(831 - 23938) |
| <i>BT Ratio</i>  | 2.52***<br>(1.59 - 3.56)   | 2.34***<br>(1.22 - 4.38)  | 2.89***<br>(1.31 - 6.66)  | <b>0.80</b><br>(0.52 - 1.18) | 1.05**<br>(0.48 - 2.41)      | 3.86***<br>(1.99 - 5.20)   | 1.03<br>(0.65 - 1.51)     | 0.98<br>(0.68 - 2.06)     | 1.35***<br>(0.81 - 2.91) |

311

312 Abbreviations: BL, Burkitt lymphoma; CLL, chronic lymphocytic leukemia; DLBC, diffuse  
313 large B-cell lymphoma; FL, follicular lymphoma; HCL, hairy cell leukemia; LPL,  
314 lymphoplasmacytic lymphoma; MCL, mantle cell lymphoma; MZL, marginal zone lymphoma.  
315 Asterisks indicate a significant difference as compared to the entity with the lowest median  
316 MedFI (bold font). Total data set (662 cases). \* p<0.01, \*\* p<0.001, \*\*\* p<0.0001.

317

318

319 **Supplemental Table 7. Monte Carlo cross-validation results.** The upper half of the table

320 describes the results when tubes 1 to 5 of the B-CLPD panel are utilized, the bottom half

321 tabulates the results using tubes 1 and 2 of the B-CLPD panel only. Mean±SD of sensitivity,

322 specificity, NPV, PPV were calculated by 1,000-fold random selection of training cases

323 (numbers per entity are the same as for the original model), adjustment of SD lines in order

324 to obtain maximal but non-overlapping areas and performing the classification of the

325 validation cases (i.e. cases that remain per disease category once the training cases are

326 taken out).

|                            | WHO diagnosis              | n   | Sensitivity | Specificity | PPV       | NPV       |
|----------------------------|----------------------------|-----|-------------|-------------|-----------|-----------|
| T1 to T5                   | BL                         | 13  | 55.8±17.7   | 99.6±0.3    | 82.9±12.1 | 98.8±0.5  |
|                            | CD10 <sup>-</sup><br>DLBCL | 31  | 9.7±6.3     | 99.4±0.4    | 51.2±23.9 | 94.2±0.4  |
|                            | CD10 <sup>+</sup><br>DLBCL | 33  | 13.5±7      | 98.5±0.8    | 40.5±15.8 | 94.0±0.4  |
|                            | CLL                        | 125 | 86.9±5.6    | 99.8±0.2    | 99.4±0.6  | 95.7±1.7  |
|                            | FL                         | 109 | 25.4±7.1    | 99.7±0.3    | 95.7±3.8  | 82.2±1.4  |
|                            | HCL                        | 38  | 91.6±5.5    | 99.9±0.1    | 98.5±1.4  | 99.3±0.5  |
|                            | LPL                        | 54  | 22.6±10.4   | 99.5±0.4    | 85.6±11.9 | 91.2±1.1  |
|                            | MCL                        | 56  | 54.9±9.8    | 99.8±0.2    | 97.2±3.1  | 94.5±1.1  |
|                            | MZL                        | 27  | 11.0±6.6    | 99.4±0.4    | 52.6±22.4 | 95±0.3    |
|                            | T1 + T2                    | BL  | 13          | 48.9±14.0   | 99.5±0.3  | 74.5±13.5 |
| CD10 <sup>-</sup><br>DLBCL |                            | 31  | 4.6±4.0     | 99.5±0.4    | 39.4±30.1 | 93.9±0.2  |
| CD10 <sup>+</sup><br>DLBCL |                            | 33  | 17.2±6.7    | 98.3±0.8    | 43.4±14.8 | 94.2±0.4  |
| CLL                        |                            | 125 | 82.1±6.3    | 99.9±0.2    | 99.6±0.5  | 94.2±1.9  |
| FL                         |                            | 109 | 25.2±7.5    | 99.7±0.3    | 96.0±3.4  | 82.2±1.5  |
| HCL                        |                            | 38  | 29.3±10.9   | 100.0±0.1   | 99.5±2.8  | 94.3±0.8  |
| LPL                        |                            | 54  | 13.5±7.2    | 99.6±0.4    | 81.7±15.3 | 90.2±0.7  |
| MCL                        |                            | 56  | 36.1±13.4   | 99.7±0.2    | 95.3±4.5  | 92.3±1.5  |
| MZL                        |                            | 27  | 5.9±5.5     | 99.5±0.4    | 40.8±29.3 | 94.7±0.3  |

327

328 Abbreviations: BL, Burkitt Lymphoma; CLL, chronic lymphocytic leukemia; DLBC, diffuse

329 large B-cell lymphoma; FL, follicular lymphoma; HCL, hairy cell leukemia; LPL,

330 lymphoplasmacytic lymphoma; MCL, mantle cell lymphoma; MZL, marginal zone lymphoma;

331 NPV, negative predictive value; PPV, positive predictive value.

332 **Supplemental Table 8. Cases rejected prior to study inclusion.**

333 Cases submitted by the local EuroFlow centers that were rejected upon review by the second  
 334 expert and reasons for exclusion. Typical examples for lacking annotations included: FISH  
 335 confirmed translocation (BL, MCL), WBC to be able to differentiate CLL from SLL/MBL, as  
 336 well as histology in DLBCL, FL, LPL, and MZL. Double submissions refer to cases for which  
 337 blood and bone marrow samples were submitted simultaneously. A purity of at least 90%  
 338 after back-bone gating (CD45, CD19, CD20, SSC, FSC) could not be reproduced in 19  
 339 cases, as benign B-cells contaminated the gates. 9 cases submitted as CLL turned out to  
 340 represent high count MBL or SLL. Technical failures frequently included suboptimal  
 341 compensation, differences of the back-bone markers between the tubes, and instability of the  
 342 acquisition likely caused by air bubbles.

| Submitted diagnosis | Reason for exclusion               |                   |           |          |           | total      |
|---------------------|------------------------------------|-------------------|-----------|----------|-----------|------------|
|                     | Annotations missing / inconclusive | double submission | purity    | SLL/MBL  | technical |            |
| > 1 diagnosis       | 7                                  |                   |           |          | 1         | 8          |
| B-cell lymphoma NOS | 11                                 |                   |           |          |           | 11         |
| BL                  | 2                                  | 1                 |           |          |           | 3          |
| CLL                 | 20                                 | 1                 | 3         | 9        | 3         | 36         |
| DLBCL               | 17                                 | 4                 | 5         |          | 3         | 29         |
| FL                  | 6                                  | 2                 | 6         |          | 3         | 17         |
| HCL                 | 3                                  |                   | 1         |          | 1         | 5          |
| LPL                 | 10                                 |                   | 2         |          | 4         | 16         |
| MCL                 | 18                                 |                   |           |          | 1         | 19         |
| MZL                 | 14                                 |                   | 2         |          | 1         | 17         |
| <b>total</b>        | <b>108</b>                         | <b>8</b>          | <b>19</b> | <b>9</b> | <b>17</b> | <b>161</b> |

343 Abbreviations: BL, Burkitt lymphoma; CLL, chronic lymphocytic leukemia; DLBCL, diffuse  
 344 large B-cell lymphoma; FL, follicular lymphoma; HCL, hairy cell leukemia; LPL,  
 345 lymphoplasmacytic lymphoma; MBL, Monoclonal B-cell lymphocytosis; MCL, mantle cell  
 346 lymphoma; MZL, marginal zone lymphoma; NOS, not otherwise specified; SLL, small  
 347 lymphocytic lymphoma.  
 348

349 **Supplemental Table 9: Markers representing predominantly background signal (BS) by**  
 350 **entity.** Markers showing background signal for both entities of a given differential diagnosis  
 351 were not considered in CCA for that particular differential diagnosis.

| marker  | BL | CD10-<br>DLBCL | CD10+<br>DLBCL | CLL | FL | HCL | LPL | MCL | MZL |
|---------|----|----------------|----------------|-----|----|-----|-----|-----|-----|
| CD10    |    | BS             |                | BS  |    |     | BS  | BS  | BS  |
| CD103   | BS | BS             | BS             | BS  | BS |     | BS  | BS  | BS  |
| CD11c   | BS | BS             | BS             |     | BS |     | BS  | BS  | BS  |
| CD19    |    |                |                |     |    |     |     |     |     |
| CD20    |    |                |                |     |    |     |     |     |     |
| CD200   | BS |                | BS             |     |    |     |     | BS  |     |
| CD22    |    |                |                |     |    |     |     |     |     |
| CD23    | BS | BS             | BS             |     | BS | BS  | BS  | BS  | BS  |
| CD27    |    | BS             |                |     |    |     |     |     |     |
| CD3     | BS | BS             | BS             | BS  | BS | BS  | BS  | BS  | BS  |
| CD31    | BS | BS             | BS             |     | BS |     |     |     |     |
| CD38    |    |                |                |     |    |     |     |     |     |
| CD39    | BS |                |                |     | BS |     |     |     |     |
| CD43    |    |                | BS             |     | BS |     |     |     | BS  |
| CD45    |    |                |                |     |    |     |     |     |     |
| CD49d   | BS |                | BS             |     |    |     |     |     |     |
| CD5     | BS | BS             | BS             |     | BS | BS  |     |     | BS  |
| CD62L   | BS | BS             | BS             |     | BS |     |     | BS  | BS  |
| CD79b   |    |                |                |     |    |     |     |     |     |
| CD81    |    |                |                |     |    |     |     |     |     |
| CD95    | BS |                |                | BS  |    |     |     | BS  |     |
| CD185   |    |                |                |     |    |     |     |     |     |
| HLADR   |    |                |                |     |    |     |     |     |     |
| IgM     |    |                |                |     |    |     |     |     |     |
| Igκ+Igλ |    |                |                |     |    |     |     |     |     |
| CD305   | BS | BS             | BS             |     | BS |     | BS  |     | BS  |

352 Abbreviations: BL, Burkitt lymphoma; BS, background signal; CLL, chronic lymphocytic  
 353 leukemia; DLBCL, diffuse large B-cell lymphoma; FL, follicular lymphoma; HCL, hairy cell  
 354 leukemia; LPL, lymphoplasmacytic lymphoma; MCL, mantle cell lymphoma; MZL, marginal  
 355 zone lymphoma.

356



357

358 **Legends to Supplemental Figures**359 **Supplemental Figure 1. Gating strategies for identification of the lymphoma clone**360 **using a CLL (A-E) and a DLBCL (F-J) case respectively as examples.** T-cells are

361 identified and removed from further analysis in CD3 vs SSC dot plots representing tube 1

362 only (light blue, A, F). A combination of scatter, CD19, CD20, and CD45 (i.e. the common

363 markers between the tubes) is used to identify the malignant clone in tubes 1 to 5 (red gates

364 are combined by Boolean 'AND', B-D and G-I). If needed, additional combinations of

365 common markers and corresponding gates are used to describe the malignant clone. The

366 purity of the identified clone is checked by Igk-Igλ light chain restriction (E, J). Gates were

367 optimized for maximum clone size while preserving the purity of the malignant clone (by

368 definition, required to exceed 90%). Please note low level Igk expression in CLL (E) and the

369 Igk expression comparable to normal B cells in DLBCL (J). The light blue line in (E) and (J)

370 represents the second standard deviation of background Igk and Igλ expression from

371 CD4<sup>+</sup>CD3<sup>+</sup> T-cells of the same sample as internal negative reference. Abbreviations: CLL,

372 chronic lymphocytic leukemia; DLBCL, diffuse large B-cell lymphoma; FSC, forward scatter;

373 SSC, side scatter;

374

375 **Supplemental Figure 2. CA1 and CA2 for the differential diagnoses of CLL vs MCL**376 **(A,E), FL vs MCL (B,F) BL vs FL (C,G) and BL vs CD10<sup>+</sup>DLBCL (D,H).** Immunophenotypic

377 information of tubes 1 to 5 (A-D) and tubes 1 plus 2 only (E-H), respectively, were used. The

378 x- and y-axes of each plot represent CA1 and CA2. CA1 is the projection that captures most

379 of the information for maximum separation between two mature B-cell lymphoma entities,

380 CA2 is the projection that provides the second greatest amount of independent information

381 for separation. Numbers in the upper right corner of each plot represent the x fold SD of the

382 immunophenotype shown. Numbers in brackets denote the relative contribution of markers to

383 CA1 and CA2, respectively (cf. supplemental Table 4 for a full list of markers and

384 coefficients). Note that the separation for MCL vs FL and for CD10<sup>+</sup>DLBCL vs BL is poorer  
385 when only the information of tubes 1 and 2 is used, so that lower fold SD lines completely  
386 separate the entities (F, H). Abbreviations: BL, Burkitt lymphoma; CLL, chronic lymphocytic  
387 leukemia; DLBCL, diffuse large B-cell lymphoma; FL, follicular lymphoma; CA, canonical  
388 axes; MCL, mantle cell lymphoma; SD, standard deviation

389

390 **Supplemental Figure 3. MedFIs of CD4 PacB (A), CD3 APC (B), CD45 PacO (C), CD5**  
391 **PerCP Cy5.5 (D) on CD4<sup>+</sup>CD3<sup>+</sup> T-cells and of CD8 FITC (E) on CD8<sup>+</sup>CD3<sup>+</sup> T-cells by**  
392 **center.** Bars represent means, whiskers represent 1 SD. Abbreviations: APC,  
393 Allophycocyanin; FITC, Fluorescein Isothiocyanate; MedFI, median fluorescence intensity;  
394 PacB, Pacific Blue; PacO, Pacific Orange; PE, Phycoerythrin; PerCP, Peridinin-Chlorophyll-  
395 Protein, SD, standard deviation

396

397 **Supplemental Figure 4. MedFIs of CD4 PacB (A), CD3 APC (B), CD45 PacO (C), CD5**  
398 **PerCP Cy5.5 (D) on CD4<sup>+</sup>CD3<sup>+</sup> T-cells and of CD8 FITC (E) on CD8<sup>+</sup>CD3<sup>+</sup> T-cells by**  
399 **sample material.** Bars represent means, whiskers represent 1 SD. Abbreviations: APC,  
400 Allophycocyanin; BM, bone marrow; CNS, central nervous system; FITC, Fluorescein  
401 Isothiocyanate; LN, lymph node; MedFI, median fluorescence intensity; PacB, Pacific Blue;  
402 PacO, Pacific Orange; PB, peripheral blood; PE, Phycoerythrin; PerCP, Peridinin-  
403 Chlorophyll-Protein; SD, standard deviation; TM, tumor mass

404

405 **Supplemental Figure 5. MedFIs of CD4 PacB (A), CD3 APC (B), CD45 PacO (C), CD5**  
406 **PerCP Cy5.5 (D) on CD4<sup>+</sup>CD3<sup>+</sup> T-cells and of CD8 FITC (E) on CD8<sup>+</sup>CD3<sup>+</sup> T-cells by year**  
407 **of acquisition.** Bars represent means, whiskers represent 1 SD. Abbreviations: APC,  
408 Allophycocyanin; FITC, Fluorescein Isothiocyanate; MedFI, median fluorescence intensity;  
409 PacB, Pacific Blue; PacO, Pacific Orange; PE, Phycoerythrin; PerCP, Peridinin-Chlorophyll-  
410 Protein, SD, standard deviation

411

412 **Supplemental Figure 6. Robust variant of Mahalanobis distance (y-axis) to check**  
413 **representativeness of training set cases for total cohort using CLL as an example.**

414 Cases are ordered by Mahalanobis distance, i.e. most typical CLL cases appear on the left.  
415 Each individual cases` median is represented by a circle. Numbers on X-axis refer to unique  
416 patient identifiers. Training set cases are shown in purple, validation cases are depicted  
417 green. Abbreviations: CLL, chronic lymphocytic leukemia

418

419 **Supplemental Figure 7. Apparent CD3 medFI values by B-cell lymphoma entity.** Marker  
420 expression in log scale. Horizontal lines indicate medians, boxes show interquartile ranges  
421 and whiskers extend to largest/smallest value within the median +/- 1.5x interquartile range.

422 Dots show cases out of the interquartile range. Each case is represented by its medFI  
423 (n=662). Abbreviations: BL, Burkitt lymphoma; CLL, chronic lymphocytic leukemia; DLBCL,  
424 diffuse large B-cell lymphoma; FL, follicular lymphoma; HCL, hairy cell leukemia; LPL,  
425 lymphoplasmacytic lymphoma; medFI, median fluorescence intensity; MCL, mantle cell  
426 lymphoma; MZL, marginal zone lymphoma

427

428 **Supplemental Figure 8. CA1 and CA2 for the differential diagnoses of classical HCL**  
429 **(pink) vs HCL variant (green).** The x- and y-axis represent CA1 and CA2. 2 SD are shown.

430 Each dot represents the median of a case. Numbers in brackets denote the relative  
431 contribution of markers to CA1 and CA2, respectively. Please note complete separation  
432 between those entities. Abbreviations: HCL, hairy cell leukemia; HCLv, hairy cell leukemia  
433 variant.

434 **Supplemental Figures**

435

436

437

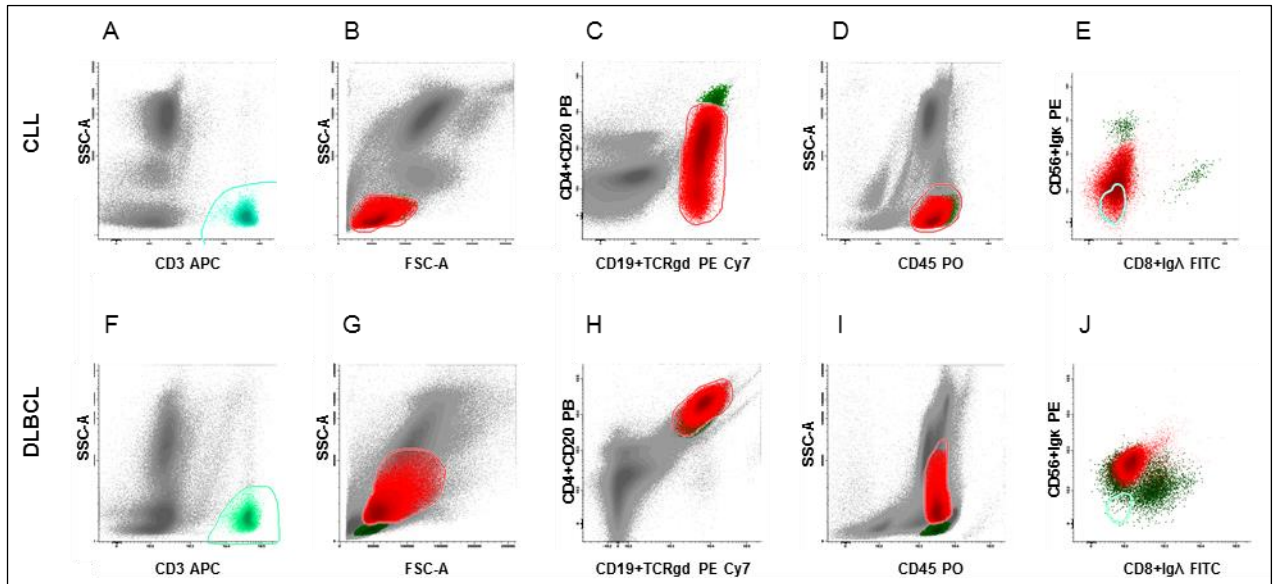

438

439 **Supplemental Figure 1**

440

441

442

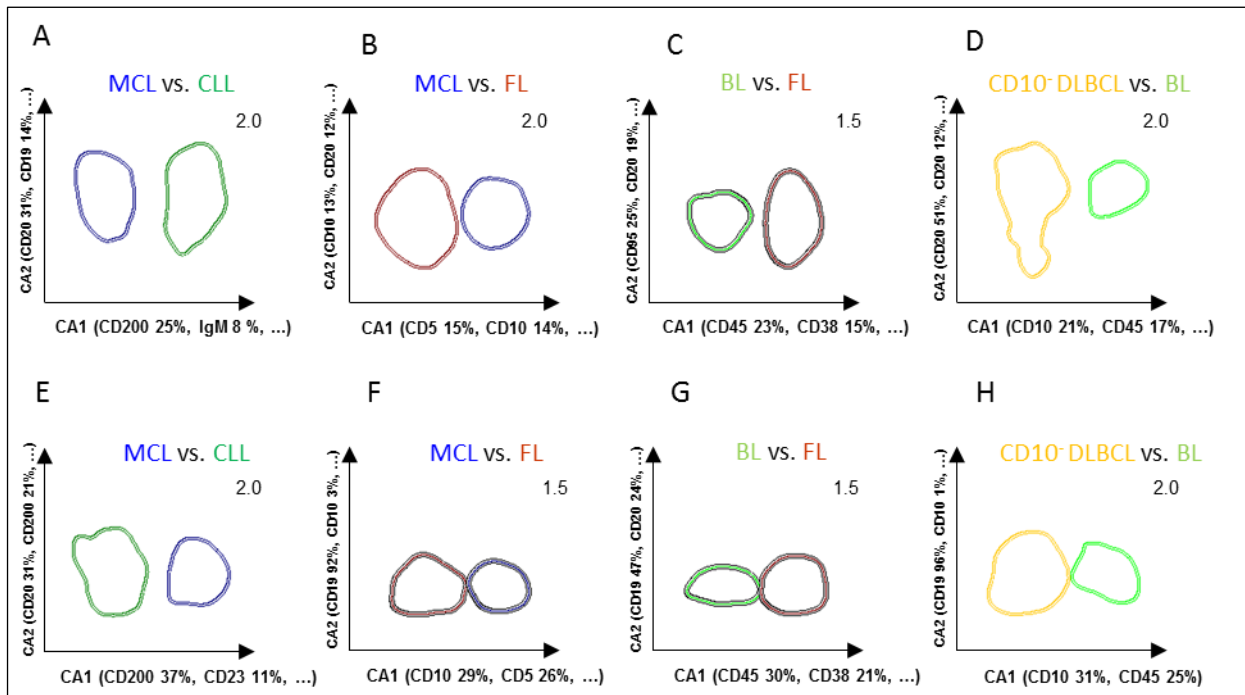

443

444 **Supplemental Figure 2**

445

446

447

448

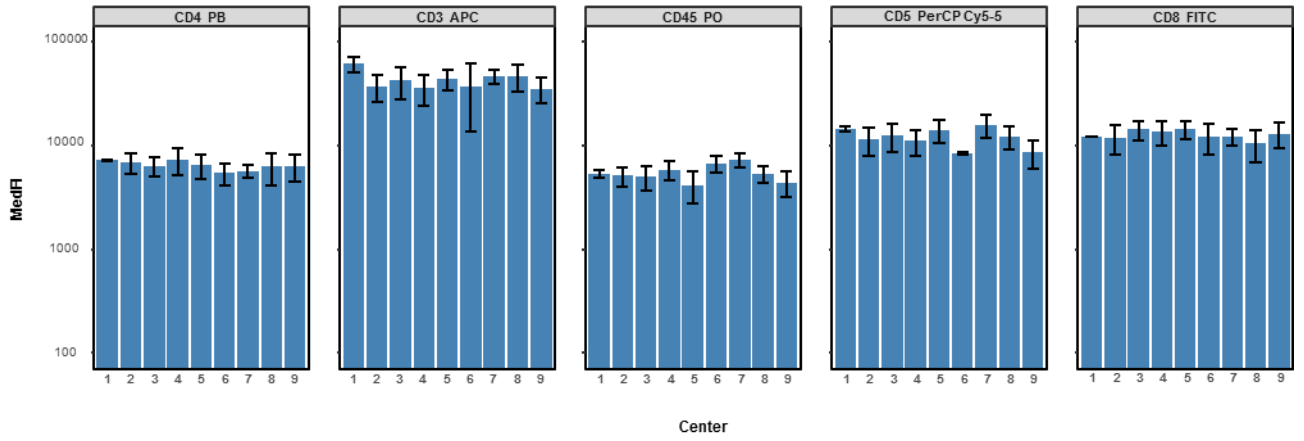

449

450

Supplemental Figure 3

451

452

453

454

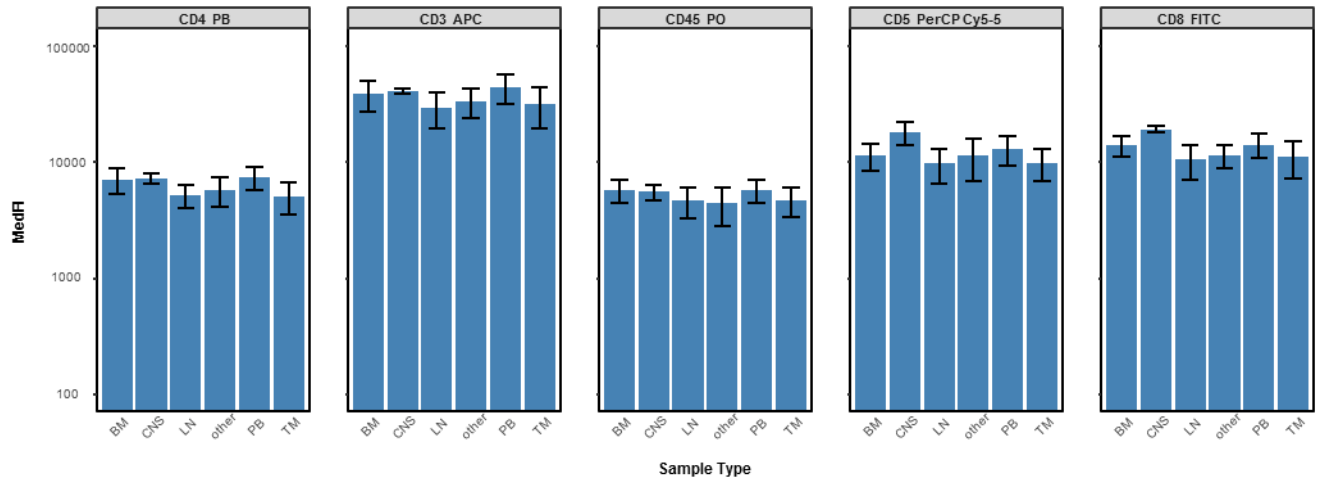

455

456 **Supplemental Figure 4**

457

458

459

460

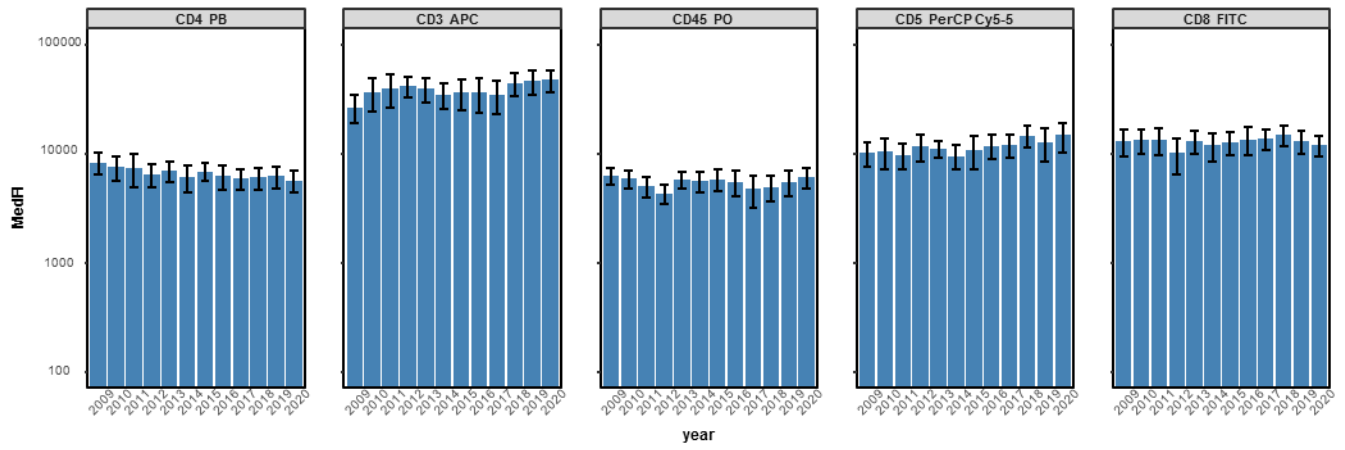

461

462 **Supplemental Figure 5**

463

464



465

466

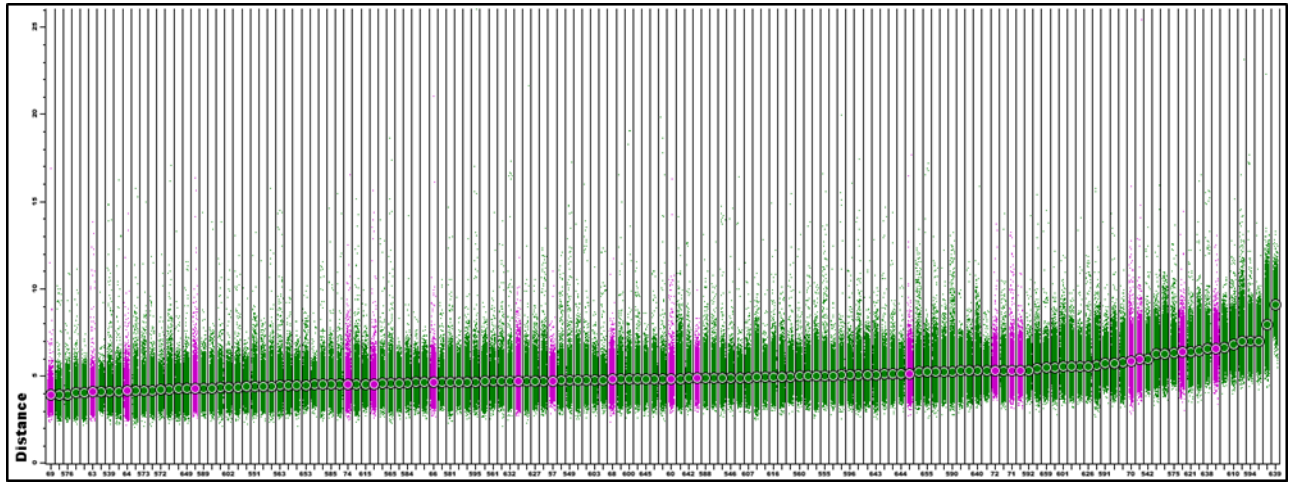

467

468 **Supplemental Figure 6**

469

470

471

472

473

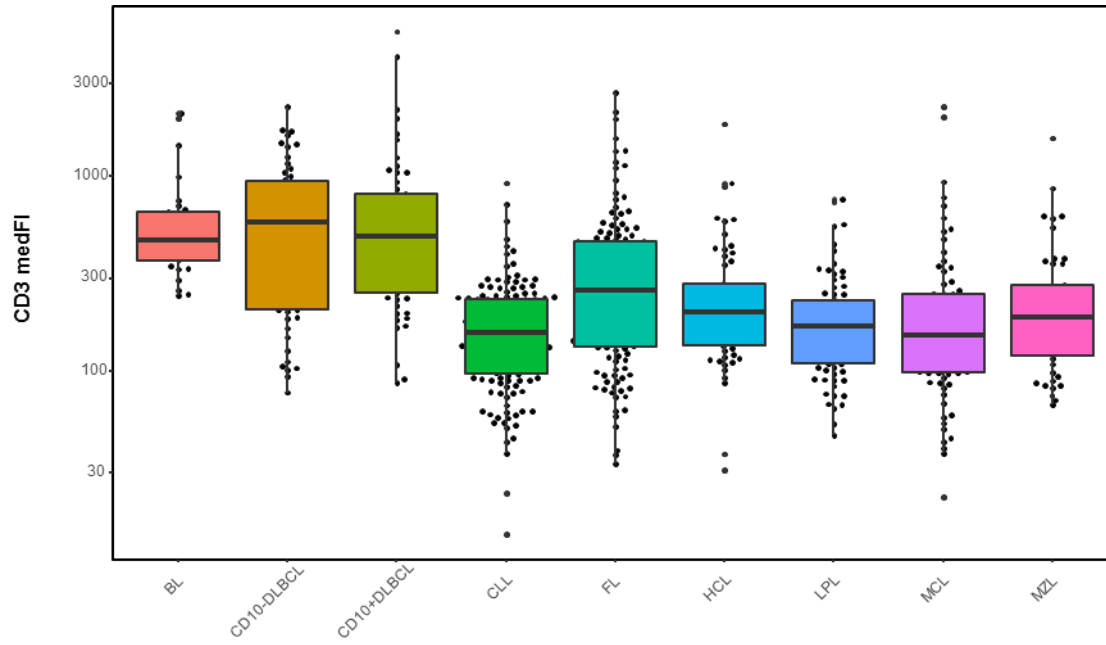

474

475 **Supplemental Figure 7**

476

477

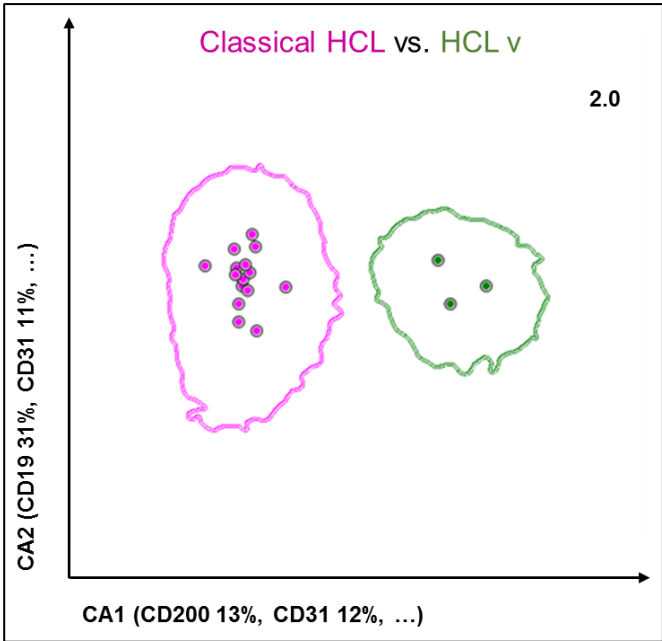

478

479

480 **Supplemental Figure 8**

481
